# Supplementary material for: Selective hydrogenolysis of 5-hydroxymethylfurfural to 2,5-dimethylfuran with ethanol as a hydrogen donor over β-Mo2C embedded in carbon microspheres
Source: Royal Society of Chemistry journal article supplement (doi:10.1039/d1se00499a), 2021-01-01
Supplement: d1se00499a1.pdf [file d1se00499a1.pdf]

### Supporting information

#### **Selective hydrogenolysis of 5-hydroxymethylfurfural to 2,5-dimethylfuran with ethanol as hydrogen donor over $\beta$ -Mo<sub>2</sub>C embedded in carbon microspheres**

Ningning Cao, Yong Chen, Kaiyun Lu, Chengming Wu, Buzaynafu Abudila, Jifan Li\*,  
Chun-Ling Liu, Wen-Sheng Dong\*

*Key Laboratory of Applied Surface and Colloid Chemistry (SNNU), MOE, School of Chemistry and Chemical Engineering, Shaanxi Normal University, Xi'an 710062, Shaanxi, China*

\*Corresponding authors. E-mail addresses: [lijifan@snnu.edu.cn](mailto:lijifan@snnu.edu.cn) (Jifan Li), [wsdong@snnu.edu.cn](mailto:wsdong@snnu.edu.cn) (Wen-Sheng Dong).

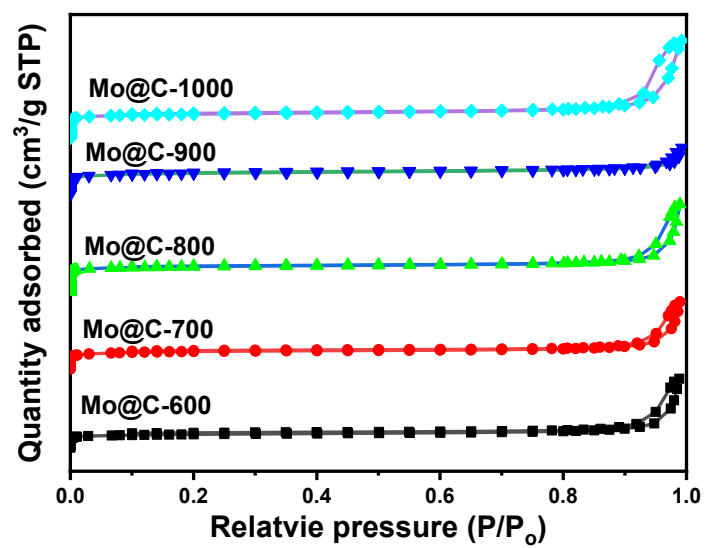

Figure S1 N<sub>2</sub> adsorption-desorption isotherms of catalysts

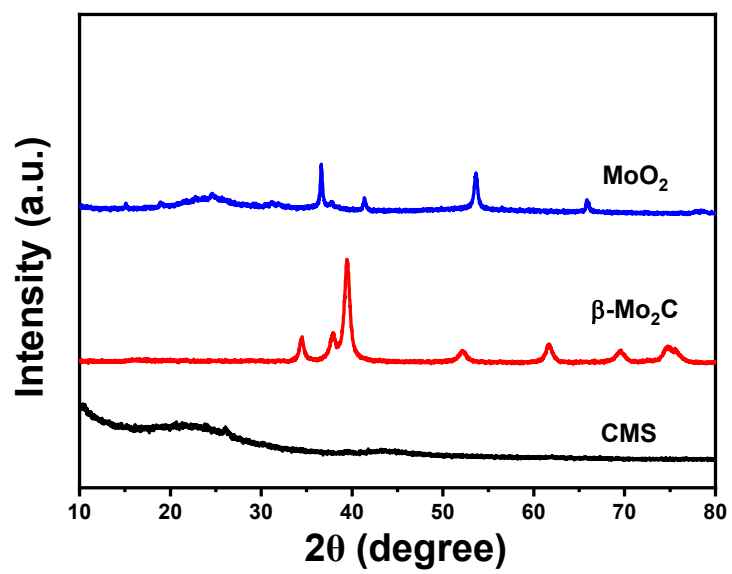

Figure S2 XRD patterns of these pure phase catalysts

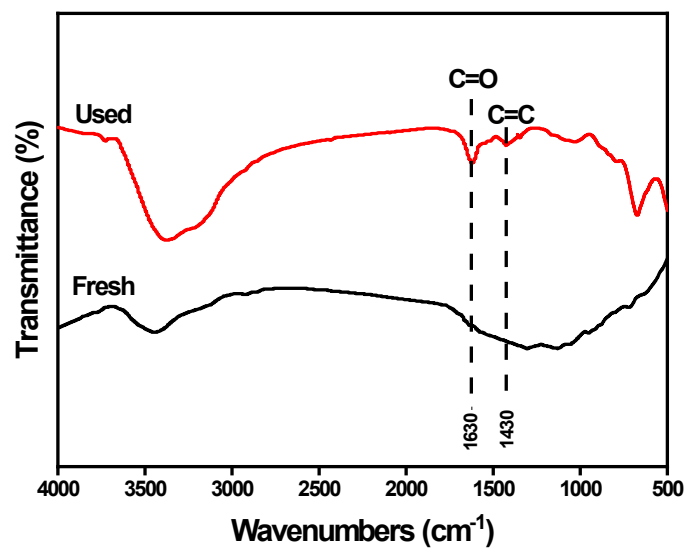

Figure S3 FTIR spectra of the fresh and used catalysts

**Table S1** Catalytic performance of catalysts<sup>a</sup>

| Catalysts           | Conversion (mol%) |      | Yield (mol%) |       |                |
|---------------------|-------------------|------|--------------|-------|----------------|
|                     | 5-HMF             | DMF  | 5-MF         | 5-MFA | DHMF           |
| CMS                 | 26.3              | –    | 4.1          | –     | – <sup>b</sup> |
| MoO <sub>2</sub>    | 4.7               | –    | 1.2          | –     | –              |
| β-Mo <sub>2</sub> C | 41.5              | 4.6  | 64.4         | –     | –              |
| Mo@C-900            | >99.9             | 15.7 | 48.1         | –     | –              |

<sup>a</sup>Reaction conditions: 0.2 g 5-HMF, 0.01 g catalyst, 20 mL tetrahydrofuran, 180 °C, 5 h, H<sub>2</sub> 2 MPa

<sup>b</sup>Not detected
